# Supplementary material for: Prophylactic efficacy of Quercetin in ameliorating the hypoxia induced vascular leakage in lungs of rats
Source: PLoS One. 2019 Jun 28;14(6):e0219075. doi: 10.1371/journal.pone.0219075 (PMC6599121; doi:10.1371/journal.pone.0219075)
Supplement: S2 File — (XLSX) [file pone.0219075.s002.xlsx]

## Sheet: Sheet1
							MDA
							(nmol/gm/tissue)
					Nor	Hypo	Hypo+Q25mg	Hypo+Q50mg	Hypo+Q100mg	Hypo+Q200mg
					50.2	122.7	68.9	60.6	98.9	94.4
					46.6	129	70	26.1	96.4	78.8
					67.6	128.7	69.8	34.4	70.9	99.4
					24.7	128	66.1	50.4	89.4	94.2
					30.4	127.1	76.4	33.8	79.2	86.8
					42.4	123.9	61.01	47.7	68.5	104.6
				Avg.	43.65	126.567	68.7017	42.1667	83.8833	93.0333
				Std. dev.	13.913	2.41086	4.62108	11.7378	11.8304	8.35657
